# Supplementary material for: Protein Conformational Changes in Breast Cancer Sera Using Infrared Spectroscopic Analysis
Source: PubMed Central journal article supplement (PMC7407230; doi:10.3390/cancers12071708), 2020-06-27
Supplement: cancers-12-01708-s001.pdf [file cancers-12-01708-s001.pdf]

# Protein Conformational Changes in Breast Cancer Sera Using Infrared Spectroscopic Analysis

Hemendra Ghimire, Chakravarthy Garlapati, Emiel A. M. Janssen, Uma Krishnamurti, Gengsheng Qin, Ritu Aneja, and A. G. Unil Perera

## Supporting Information

### Breast cancer (BC) patients' information

**Table S1.** Information about the patients: Biopsy results such as Invasive lobular carcinoma (ILC), Invasive ductal carcinoma (IDC), Ductal Carcinoma In-Situ (DCIS) confirmed the BC diagnoses. The tumor grading assessment was performed based on the national cancer institute (NCI) guidelines. Grade-2 denotes the intermediate grade or moderately differentiated tumor where as grade-3 denotes a high grade or poorly differentiated tumor.

| ID                | 1               | 2               | 3                 | 4          | 5         | 6                  | 7         | 8              | 9               | 10                 |
|-------------------|-----------------|-----------------|-------------------|------------|-----------|--------------------|-----------|----------------|-----------------|--------------------|
| Age years         | 41.95           | 56.55           | 65.36             | 46.98      | 50.39     | 37.86              | 58.24     | 30.97          | 65.97           | 63.75              |
| BMI               | 40.09           | 28.63           | 33.43             | 38.52      | 54.8      | N/A                | 21.14     | 33.59          | 25.96           | 22.78              |
| Menstrual Status  | Pre menopausal  | Post menopausal | Post menopausal   | N/A        | N/A       | Pre menopausal     | Unknown   | Pre menopausal | Post menopausal | N/A                |
| BC Discovery      | Screening       | Screening       | Accidental        | Accidental | Screening | Accidental         | Self-exam | Self-exam      | Self-exam       | Pain               |
| History           | No              | Yes             | No                | No         | No        | No                 | Yes       | No             | No              | Yes                |
| Tumor Size        | .9 x .9 x 1.1cm | 1 x .8cm        | 1.99x1.82 x1.14cm | 5.3x3.9 cm | 2.5 cm    | 6.6 x 3.9 x 4.2 cm | 5 cm      | 2.4 x 2.1 cm   | 5.0 cm          | 7.0 x 5.3 x 3.7 cm |
| Laterality Biopsy | Right           | Right           | Left              | Right      | Right     | Left               | Left      | Right          | Left            | Left               |
| Biopsy Results    | ILC             | IDC             | IDC               | IDC        | IDC       | IDC                | IDC       | IDC            | IDC             | IDC                |

| Type of Surgery                      | Lymph Nodes | Malignant Grade |
|--------------------------------------|-------------|-----------------|
| Mastectomy                           | Yes         | 2               |
| Mastectomy SLNB                      | Yes         | 3               |
| Mastectomy                           | Yes         | 3               |
| Partial Mastectomy (lumpectomy) SLNB | No          | 3               |
| Mastectomy ALND                      | Yes         | 3               |
| Mastectomy SLNB                      | No          | 3               |
| Mastectomy SLNB                      | No          | 3               |
| Partial Mastectomy (lumpectomy) SLNB | Yes         | 3               |
| Partial Mastectomy (lumpectomy) SLNB | No          | 2               |
| Mastectomy SLNB                      | No          | 3               |

Table S1. shows the breast cancer (BC) patients clinical information. The age of BC patients ranges from 30 years to 65 years and the age of control volunteers lies within this interval (41 to 58 years). The median age for BC patients and control volunteers remains similar; 53 years for BC and 52 years for controls. All BC patients were triple-negative (the hormone receptor subtype; estrange receptor (ER), progesterone receptor (PR) and human epidermal growth factor receptor-2 (HER2/neu) status was negative).
